# Supplementary material for: Morphological, functional, and phylogenetic aspects of the head capsule of the cockroachErgaula capucina(Insecta/Blattodea)
Source: PeerJ journal article supplement (doi:10.7717/peerj.12470), 2022-04-19
Supplement: Supplementary_table_1.pdf [file Supplementary_table_1.pdf]

Supplementary table 1: Individual measurements for the bundles of the mandibular muscles in *Periplaneta americana*. Specimen numbers (#) are identical to Weihmann et al. 2015

|             |          | Area [mm <sup>2</sup> ]   |       |       |         |                    | Area [%]   |         |         |         |                    |
|-------------|----------|---------------------------|-------|-------|---------|--------------------|------------|---------|---------|---------|--------------------|
|             |          | # 3                       | #4    | #12   | Average | Standard deviation | # 3        | #4      | #12     | Average | Standard deviation |
| Omd1 left   | complete | 2,257                     | 1,813 | 2,225 | 2,098   | 0,247              | 100,000    | 100,000 | 100,000 | 100,000 | 0,000              |
|             | a_l      | 0,581                     | 0,481 | 0,535 | 0,532   | 0,051              | 25,763     | 26,502  | 24,061  | 25,442  | 1,252              |
|             | b_l      | 0,537                     | 0,366 | 0,574 | 0,492   | 0,111              | 23,776     | 20,175  | 25,792  | 23,248  | 2,845              |
|             | c_l      | 0,334                     | 0,233 | 0,393 | 0,320   | 0,081              | 14,820     | 12,871  | 17,661  | 15,117  | 2,409              |
|             | d_l      | 0,173                     | 0,130 | 0,160 | 0,154   | 0,022              | 7,654      | 7,189   | 7,174   | 7,339   | 0,273              |
|             | e_l      | 0,218                     | 0,344 | 0,223 | 0,262   | 0,072              | 9,639      | 18,993  | 10,042  | 12,892  | 5,288              |
|             | f_l      | 0,219                     | 0,108 | 0,148 | 0,158   | 0,056              | 9,698      | 5,935   | 6,667   | 7,433   | 1,995              |
|             | g_l      | 0,161                     | 0,133 | 0,168 | 0,154   | 0,018              | 7,138      | 7,347   | 7,531   | 7,339   | 0,196              |
|             | h_l      | 0,034                     | 0,018 | 0,024 | 0,025   | 0,008              | 1,511      | 0,987   | 1,071   | 1,190   | 0,281              |
| Omd1 right  | complete | 2,556                     | 2,310 | 2,202 | 2,356   | 0,181              | 100,000    | 100,000 | 100,000 | 100,000 | 0,000              |
|             | a_r      | 0,554                     | 0,597 | 0,444 | 0,532   | 0,079              | 21,656     | 25,855  | 20,163  | 22,558  | 2,951              |
|             | b_r      | 0,595                     | 0,480 | 0,449 | 0,508   | 0,077              | 23,264     | 20,795  | 20,394  | 21,484  | 1,554              |
|             | c_r      | 0,282                     | 0,375 | 0,344 | 0,334   | 0,048              | 11,020     | 16,243  | 15,639  | 14,301  | 2,857              |
|             | d_r      | 0,298                     | 0,231 | 0,251 | 0,260   | 0,034              | 11,662     | 10,017  | 11,395  | 11,025  | 0,883              |
|             | e_r      | 0,599                     | 0,427 | 0,482 | 0,503   | 0,088              | 23,429     | 18,499  | 21,884  | 21,271  | 2,522              |
|             | f_r      | 0,104                     | 0,087 | 0,098 | 0,096   | 0,008              | 4,054      | 3,765   | 4,459   | 4,093   | 0,349              |
|             | g_r      | 0,081                     | 0,052 | 0,107 | 0,080   | 0,027              | 3,153      | 2,269   | 4,840   | 3,420   | 1,306              |
|             | h_r      | 0,045                     | 0,059 | 0,027 | 0,044   | 0,016              | 1,762      | 2,559   | 1,227   | 1,849   | 0,670              |
| Omd2 left   | 0,138    | 0,135                     | 0,173 | 0,149 | 0,021   | -                  | -          | -       | -       | -       |                    |
| Omd 2 right | 0,229    | 0,237                     | 0,219 | 0,228 | 0,009   | -                  | -          | -       | -       | -       |                    |
|             |          | Volume [mm <sup>3</sup> ] |       |       |         |                    | Volume [%] |         |         |         |                    |
|             |          | # 3                       | #4    | #12   | Average | Standard deviation | # 3        | #4      | #12     | Average | Standard deviation |
| Omd1 left   | complete | 3,055                     | 2,156 | 3,125 | 2,779   | 0,540              | 100,000    | 100,000 | 100,000 | 100,000 | 0,000              |
|             | a_l      | 0,803                     | 0,626 | 0,749 | 0,726   | 0,091              | 26,302     | 29,012  | 23,969  | 26,428  | 2,524              |
|             | b_l      | 0,603                     | 0,398 | 0,683 | 0,561   | 0,147              | 19,738     | 18,448  | 21,868  | 20,018  | 1,727              |
|             | c_l      | 0,637                     | 0,306 | 0,724 | 0,556   | 0,221              | 20,848     | 14,176  | 23,169  | 19,398  | 4,668              |
|             | d_l      | 0,132                     | 0,115 | 0,158 | 0,135   | 0,022              | 4,314      | 5,328   | 5,053   | 4,898   | 0,524              |
|             | e_l      | 0,383                     | 0,406 | 0,394 | 0,394   | 0,011              | 12,551     | 18,825  | 12,592  | 14,656  | 3,610              |
|             | f_l      | 0,209                     | 0,130 | 0,184 | 0,174   | 0,040              | 6,828      | 6,024   | 5,898   | 6,250   | 0,505              |
|             | g_l      | 0,209                     | 0,141 | 0,194 | 0,181   | 0,035              | 6,826      | 6,556   | 6,209   | 6,530   | 0,310              |
|             | h_l      | 0,079                     | 0,035 | 0,039 | 0,051   | 0,024              | 2,592      | 1,630   | 1,242   | 1,822   | 0,695              |
| Omd1 right  | complete | 3,959                     | 3,432 | 3,358 | 3,583   | 0,328              | 100,000    | 100,000 | 100,000 | 100,000 | 0,000              |
|             | a_r      | 0,887                     | 0,841 | 0,755 | 0,828   | 0,067              | 22,398     | 24,516  | 22,476  | 23,130  | 1,201              |
|             | b_r      | 0,714                     | 0,626 | 0,673 | 0,671   | 0,044              | 18,033     | 18,244  | 20,029  | 18,769  | 1,097              |
|             | c_r      | 0,702                     | 0,657 | 0,558 | 0,639   | 0,074              | 17,737     | 19,147  | 16,628  | 17,838  | 1,262              |
|             | d_r      | 0,324                     | 0,338 | 0,297 | 0,320   | 0,021              | 8,175      | 9,849   | 8,845   | 8,957   | 0,843              |
|             | e_r      | 0,971                     | 0,697 | 0,765 | 0,811   | 0,143              | 24,518     | 20,299  | 22,775  | 22,531  | 2,120              |
|             | f_r      | 0,179                     | 0,109 | 0,125 | 0,138   | 0,037              | 4,534      | 3,165   | 3,716   | 3,805   | 0,689              |
|             | g_r      | 0,100                     | 0,084 | 0,141 | 0,108   | 0,030              | 2,517      | 2,438   | 4,196   | 3,051   | 0,993              |
|             | h_r      | 0,083                     | 0,080 | 0,045 | 0,069   | 0,021              | 2,088      | 2,342   | 1,334   | 1,921   | 0,524              |
| Omd2 left   | 0,389    | 0,352                     | 0,355 | 0,365 | 0,020   | -                  | -          | -       | -       | -       |                    |
| Omd 2 right | 0,481    | 0,436                     | 0,370 | 0,429 | 0,056   | -                  | -          | -       | -       | -       |                    |
